# Supplementary material for: Enhanced Understanding of Infectious Diseases by Fusing Multiple Datasets: A Case Study on Malaria in the Western Brazilian Amazon Region
Source: PLoS One. 2011 Nov 8;6(11):e27462. doi: 10.1371/journal.pone.0027462 (PMC3210805; doi:10.1371/journal.pone.0027462)
Supplement: Table S1 — Likelihood of each of the possible outcomes in AACD. (DOC) [file pone.0027462.s003.doc]

|  |  | S | Likelihood |
| --- | --- | --- | --- |
| X | 0 | X |  |
| X | 1 | X |  |
| 0 | X | X |  |
| 1 | X | X |  |
| X | 1 | 0 |  |
| X | 0 | 0 |  |
| X | 0 | 1 |  |
| X | 1 | 1 |  |
| 1 | X | 0 |  |
| 0 | X | 0 |  |
| 0 | X | 1 |  |
| 1 | X | 1 |  |
| 1 | 0 | X |  |
| 0 | 0 | X |  |
| 0 | 1 | X |  |
| 1 | 1 | X |  |
| 0 | 0 | 0 |  |
| 1 | 1 | 1 |  |
| 0 | 0 | 1 |  |
| 0 | 1 | 0 |  |
| 1 | 0 | 0 |  |
| 1 | 1 | 0 |  |
| 0 | 1 | 1 |  |
| 1 | 0 | 1 |  |

Note: ‘X’ denotes missing data.
